# Supplementary material
Source: publisher figshare collection journal article supplement (https://acs.figshare.com/ndownloader/files/3717274)
Supplement: Supplementary file 1 [file 3717274]

## Supporting Information (SI)

# A Novel Approach for Rapid Preparation of Monophasic Microemulsions That Facilitates Penetration of Woody Biomass

Xueyu Du,<sup>†,‡,§</sup> Lucian A. Lucia,<sup>\*,†,‡,§</sup> Reza A. Ghiladi<sup>\*,†</sup>

<sup>†</sup> Department of Chemistry, North Carolina State University, Raleigh, NC 27695-8204, USA

<sup>‡</sup> Department of Forest Biomaterials, North Carolina State University, Raleigh, NC 27695-8005, USA

<sup>§</sup> Qilu University of Technology, Key Laboratory of Pulp & Paper Science and Technology of the Ministry of Education, Shandong Province, Jinan, 250353, P.R. China

| Contents                                                                                   | Page |
|--------------------------------------------------------------------------------------------|------|
| Phase behavior scanning for $C_{\text{SDS}} = 20 \text{ mg/mL H}_2\text{O}$ . <sup>a</sup> | S2   |
| Phase behavior scanning for $C_{\text{SDS}} = 40 \text{ mg/mL H}_2\text{O}$ . <sup>a</sup> | S3   |
| Phase behavior scanning for $C_{\text{SDS}} = 60 \text{ mg/mL H}_2\text{O}$ . <sup>a</sup> | S4   |
| Phase behavior scanning for $C_{\text{SDS}} = 80 \text{ mg/mL H}_2\text{O}$ . <sup>a</sup> | S5   |

**Table S1** Phase behavior scanning for  $C_{\text{SDS}} = 20 \text{ mg/mL H}_2\text{O}$ .<sup>a</sup>

| Dodecane addition (mL) | Pentanol addition (mL) | Water to oil ratio (WOR) (mL:mL) | Surfactant to alcohol ratio (SAR) (g:mL) | Winsor type            | Series no. |
|------------------------|------------------------|----------------------------------|------------------------------------------|------------------------|------------|
| 0.1                    | 0.1                    | 1:0.02                           | 1:1                                      | Winsor-I               |            |
|                        | 0.2                    |                                  | 1:2                                      | Winsor-IV              |            |
| 0.2                    |                        | 1:0.04                           |                                          | Winsor-IV              | SOW-A1     |
| 0.3                    |                        | 1:0.06                           |                                          | Winsor-IV              |            |
| 0.4                    |                        | 1:0.08                           |                                          | Winsor-I               |            |
|                        | 0.3                    |                                  | 1:3                                      | Winsor-II              |            |
| 0.5                    |                        | 1:0.10                           |                                          | Winsor-II              |            |
| 0.6                    |                        | 1:0.12                           |                                          | Winsor-II              |            |
| 0.7                    |                        | 1:0.14                           |                                          | Winsor-II              |            |
| 0.8                    |                        | 1:0.16                           |                                          | Winsor-II              |            |
| 0.9                    |                        | 1:0.18                           |                                          | Winsor-III (Stop sign) |            |

<sup>a</sup> initial water volume = 5 mL;  $C_{\text{NaCl}} = 20 \text{ mg/mL H}_2\text{O}$ .

**Table S2** Phase behavior scanning for  $C_{\text{SDS}} = 40 \text{ mg/mL H}_2\text{O}$ .<sup>a</sup>

| Dodecane addition (mL) | Pentanol addition (mL) | Water to oil ratio (WOR) (mL:mL) | Surfactant to alcohol ratio (SAR) (g:mL) | Winsor type | Series no. |
|------------------------|------------------------|----------------------------------|------------------------------------------|-------------|------------|
| 0.1                    | 0.1                    | 1:0.02                           | 1:0.5                                    | Winsor-IV   | SOW-B1     |
| 0.2                    |                        | 1:0.04                           |                                          | Winsor-I    |            |
| 0.3                    | 0.2                    |                                  | 1:0.06                                   | 1:1.0       | Winsor-IV  |
|                        |                        | Winsor-I                         |                                          |             |            |
| 0.4                    | 0.3                    | 1:0.08                           | 1:1.5                                    | Winsor-II   |            |
| 0.5                    |                        |                                  |                                          | Winsor-IV   | SOW-B3     |
| 0.6                    |                        |                                  |                                          | Winsor-IV   | SOW-B4     |
| 0.7                    |                        |                                  |                                          | Winsor-IV   | SOW-B5     |
| 0.8                    |                        |                                  |                                          | Winsor-I    |            |
| 0.9                    |                        |                                  |                                          | 1:0.16      | 1:2.0      |
|                        | Winsor-II              |                                  |                                          |             |            |
|                        | Winsor-II              |                                  |                                          |             |            |
|                        | Winsor-IV              | SOW-B6                           |                                          |             |            |
| 1.0                    | 0.4                    | 1:0.20                           | 1:2.5                                    | Winsor-I    |            |
| 1.1                    |                        |                                  |                                          | Winsor-II   |            |
| 1.2                    |                        |                                  |                                          | Winsor-II   |            |
| 1.3                    |                        |                                  |                                          | Winsor-II   |            |
| 1.4                    |                        |                                  |                                          | Winsor-II   |            |
| 1.5                    |                        |                                  |                                          | Winsor-II   |            |
| 1.6                    | 0.5                    | 1:0.24                           | Winsor-III (Stop sign)                   |             |            |

<sup>a</sup> initial water volume = 5 mL;  $C_{\text{NaCl}} = 20 \text{ mg/mL H}_2\text{O}$ .

**Table S3** Phase behavior scanning for  $C_{\text{SDS}} = 60 \text{ mg/mL H}_2\text{O}$ .<sup>a</sup>

| Dodecane addition (mL) | Pentanol addition (mL) | Water to oil ratio (WOR) (mL:mL) | Surfactant to alcohol ratio (SAR) (g:mL) | Winsor type            | Series no. |
|------------------------|------------------------|----------------------------------|------------------------------------------|------------------------|------------|
| 0.1                    | 0.1                    | 1:0.02                           | 1:0.3                                    | Winsor-I               |            |
|                        |                        |                                  |                                          | Winsor-IV              | SOW-C1     |
| 0.2                    | 0.2                    | 1:0.04                           | 1:0.7                                    | Winsor-IV              |            |
| 0.3                    |                        | 1:0.06                           |                                          | Winsor-I               |            |
| 0.4                    | 0.3                    | 1:0.08                           | 1:1.0                                    | Winsor-IV              | SOW-C2     |
| 0.5                    |                        | 1:0.10                           |                                          | Winsor-IV              | SOW-C3     |
| 0.6                    |                        | 1:0.12                           |                                          | Winsor-IV              | SOW-C4     |
| 0.7                    |                        | 1:0.14                           |                                          | Winsor-I               |            |
| 0.8                    | 0.4                    | 1:0.16                           | 1:1.3                                    | Winsor-IV              | SOW-C5     |
| 0.9                    |                        | 1:0.18                           |                                          | Winsor-IV              |            |
| 1.0                    |                        | 1:0.20                           |                                          | Winsor-IV              |            |
| 1.1                    |                        | 1:0.22                           |                                          | Winsor-I               |            |
| 1.2                    | 0.5                    | 1:0.24                           | 1:1.7                                    | Winsor-IV              | SOW-C6     |
| 1.3                    |                        | 1:0.26                           |                                          | Winsor-IV              | SOW-C7     |
| 1.4                    |                        | 1:0.28                           |                                          | Winsor-IV              |            |
| 1.5                    |                        | 1:0.30                           |                                          | Winsor-IV              | SOW-C8     |
| 1.6                    |                        | 1:0.32                           |                                          | Winsor-I               |            |
| 1.7                    | 0.6                    | 1:0.34                           | 1:2.0                                    | Winsor-II              |            |
| 1.8                    |                        | 1:0.36                           |                                          | Winsor-II              |            |
| 1.9                    |                        | 1:0.38                           |                                          | Winsor-IV              |            |
| 2.0                    |                        | 1:0.40                           |                                          | Winsor-IV              | SOW-C9     |
| 2.1                    |                        | 1:0.42                           |                                          | Winsor-I               |            |
| 2.2                    | 0.7                    | 1:0.44                           | 1:2.3                                    | Winsor-II              |            |
| 2.3                    |                        | 1:0.46                           |                                          | Winsor-II              |            |
| 2.4                    |                        | 1:0.48                           |                                          | Winsor-II              |            |
| 2.5                    |                        | 1:0.50                           |                                          | Winsor-II              |            |
| 2.6                    |                        | 1:0.52                           |                                          | Winsor-III (Stop sign) |            |

<sup>a</sup> initial water volume = 5 mL;  $C_{\text{NaCl}} = 20 \text{ mg/mL H}_2\text{O}$ .

**Table S4** Phase behavior scanning for  $C_{\text{SDS}} = 80 \text{ mg/mL H}_2\text{O}$ .<sup>a</sup>

| Dodecane addition (mL) | Pentanol addition (mL) | Water to oil ratio (WOR) (mL:mL) | Surfactant to alcohol ratio (SAR) (g:mL) | Winsor type | Series no. |
|------------------------|------------------------|----------------------------------|------------------------------------------|-------------|------------|
| 0.1                    | 0.1                    | 1:0.02                           | 1:0.25                                   | Winsor-I    |            |
|                        | 0.2                    |                                  | 1:0.50                                   | Winsor-IV   |            |
| 0.2                    | 0.3                    | 1:0.04                           | 1:0.75                                   | Winsor-I    |            |
| 0.3                    |                        | 1:0.06                           |                                          | Winsor-IV   |            |
| 0.4                    |                        | 1:0.08                           |                                          | Winsor-IV   |            |
| 0.5                    |                        | 1:0.10                           |                                          | Winsor-I    |            |
| 0.6                    | 0.4                    | 1:0.12                           | 1:1.0                                    | Winsor-IV   | SOW-D1     |
| 0.7                    |                        | 1:0.14                           |                                          | Winsor-IV   | SOW-D2     |
| 0.8                    |                        | 1:0.16                           |                                          | Winsor-IV   | SOW-D3     |
| 0.9                    |                        | 1:0.18                           |                                          | Winsor-IV   | SOW-D4     |
| 1.0                    |                        | 1:0.20                           |                                          | Winsor-I    | SOW-D5     |
| 1.1                    | 0.5                    | 1:0.22                           | 1:1.25                                   | Winsor-IV   | SOW-D6     |
| 1.2                    |                        | 1:0.24                           |                                          | Winsor-IV   | SOW-D7     |
| 1.3                    |                        | 1:0.26                           |                                          | Winsor-IV   |            |
| 1.4                    |                        | 1:0.28                           |                                          | Winsor-IV   |            |
| 1.5                    |                        | 1:0.30                           |                                          | Winsor-I    |            |
| 1.6                    | 0.6                    | 1:0.32                           | 1:1.50                                   | Winsor-IV   |            |
| 1.7                    |                        | 1:0.34                           |                                          | Winsor-IV   |            |
| 1.8                    |                        | 1:0.36                           |                                          | Winsor-IV   | SOW-D8     |
| 1.9                    |                        | 1:0.38                           |                                          | Winsor-IV   |            |
| 2.0                    |                        | 1:0.40                           |                                          | Winsor-I    |            |
| 2.1                    | 0.7                    | 1:0.42                           | 1:1.75                                   | Winsor-IV   |            |
| 2.2                    |                        | 1:0.44                           |                                          | Winsor-IV   |            |
| 2.3                    |                        | 1:0.46                           |                                          | Winsor-IV   | SOW-D9     |
| 2.4                    |                        | 1:0.48                           |                                          | Winsor-IV   |            |
| 2.5                    |                        | 1:0.50                           |                                          | Winsor-I    |            |
| 2.6                    | 0.8                    | 1:0.52                           | 1:2.0                                    | Winsor-II   |            |
| 2.7                    |                        | 1:0.54                           |                                          | Winsor-II   |            |
| 2.8                    |                        | 1:0.56                           |                                          | Winsor-IV   |            |
| 2.9                    |                        | 1:0.58                           |                                          | Winsor-IV   |            |
| 3.0                    |                        | 1:0.60                           |                                          | Winsor-I    |            |
|                        | 0.9                    |                                  | 1:2.25                                   | Winsor-II   |            |

|     |  |        |  |                           |  |
|-----|--|--------|--|---------------------------|--|
| 3.1 |  | 1:0.62 |  | Winsor-II                 |  |
| 3.2 |  | 1:0.64 |  | Winsor-II                 |  |
| 3.3 |  | 1:0.66 |  | Winsor-II                 |  |
| 3.4 |  | 1:0.68 |  | Winsor-II                 |  |
| 3.5 |  | 1:0.70 |  | Winsor-II                 |  |
| 3.6 |  | 1:0.72 |  | Winsor-III<br>(Stop sign) |  |

<sup>a</sup> initial water volume = 5 mL;  $C_{\text{NaCl}} = 20 \text{ mg/mL H}_2\text{O}$ .
